# Supplementary material for: The immunolocalization of cluster of differentiation 31, phalloidin and alpha smooth muscle actin on vascular network of normal and ischemic rat brain
Source: Springer Nature journal article supplement (doi:10.1038/s41598-022-26831-6), 2022-12-24
Supplement: MOESM1 [file 41598_2022_26831_MOESM1_ESM.pdf]

# The immunolocalization of cluster of differentiation 31, phalloidin and alpha smooth muscle actin on vascular network of normal and ischemic rat brain

Jia Wang<sup>1,†</sup>, Yating Guo<sup>1,†</sup>, Dongsheng Xu<sup>1</sup>, Jingjing Cui<sup>1</sup>, Yuqing Wang<sup>1</sup>, Yuxin Su<sup>1</sup>, Yihan Liu<sup>1</sup>, Yi Shen<sup>1</sup>, Xianghong Jing<sup>1</sup>, and Wanzhu Bai<sup>1,\*</sup>

<sup>1</sup> Institute of Acupuncture and Moxibustion, China Academy of Chinese Medical Sciences, Beijing, China, 100700

\* Correspondence: Wanzhu Bai, Institute of Acupuncture and Moxibustion, China Academy of Chinese Medical Sciences; Email: wanzhubaisy@hotmail.com.

† These authors contributed equally to this work.

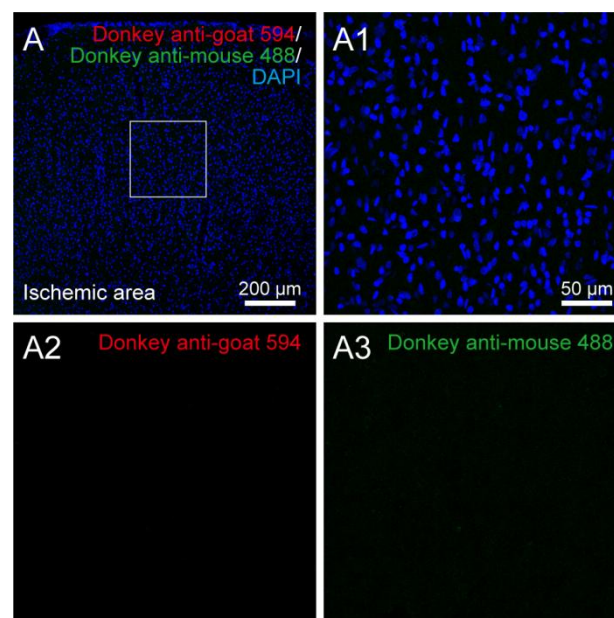

**Supplementary Figure 1.** Distribution of secondary antibodies donkey anti-goat Alexa Fluor (AF) 594 and donkey anti-mouse AF488 in the rat brain with ischemia/reperfusion.

A: Representative photograph from the cerebral cortex directly labeled with donkey anti-goat AF594 and donkey anti-mouse AF488 showing there was no positive expression. A1-A3: Corresponding magnified photograph from panel A (box-indicated region) showing the detailed labeling (A1) separately with donkey anti-goat AF594 (A2) and donkey anti-mouse AF488 (A3). The cellular nucleus was stained by DAPI (blue). Scale bars: 200 μm in A, 50 μm in A1-A3.

**Supplementary Table 1. Application of gP-CD31 and mM-CD31 in previous studies**

| References                | Antibody | Animal | Model                         | Finding                                                                                                                                                                                                                                                                                                                                                                                                                                                                                                                                                                                                | Vascular network |
|---------------------------|----------|--------|-------------------------------|--------------------------------------------------------------------------------------------------------------------------------------------------------------------------------------------------------------------------------------------------------------------------------------------------------------------------------------------------------------------------------------------------------------------------------------------------------------------------------------------------------------------------------------------------------------------------------------------------------|------------------|
| Shen 2022 <sup>1</sup>    | gP-CD31  | Rat    | Multiple cerebral infarctions | Under normal circumstances there was a modest expression of CD31-labeled capillaries. Following surgery, the necrosis of blocked arteries and the proliferation of surrounding capillaries were carried out over time. CD31-labeled capillaries were abundantly expressed surrounding the infarcted vessels.                                                                                                                                                                                                                                                                                           | Yes              |
| Zhang 2022 <sup>2</sup>   | gP-CD31  | Mouse  | Ischemia/reperfusion          | The sham operation group had unconstricted microvessels near the PDGFR- $\beta$ -positive pericytes and no pathological changes. After 2, 12, and 24 hours of cerebral ischemia/reperfusion, the morphology of the CD31-labeled capillaries near the pericyte cell bodies changed, with distortion and even narrowing of the tube diameter, which positively correlated with the reperfusion time.                                                                                                                                                                                                     | Yes              |
| Wang 2021 <sup>3</sup>    | gP-CD31  | Mouse  | Corneal injury                | CD31 revealed the vasculature in the limbus area after injury and treatment. In comparison with the relatively dim staining of CD31 in no injury controls, PBS-treated corneas demonstrated an increase of vasculature in the limbus area at 1 and 2 weeks after surgery, consistent with chronic inflammation and possible neovascularization. Micro-UBM-treated corneas showed some increase of vasculature in the limbus area at 1 week after surgery, but by week 2, the extent of vascularization decreased. The vasculature in the UF-UBM group remained low at both 1 and 2 weeks after injury. | Yes              |
| Chen 2020 <sup>4</sup>    | gP-CD31  | Mouse  | Aged model                    | CD31-labeled vascular networks in hippocampus of young (3 months) and aged (20 months) mice were provided with no quantification.                                                                                                                                                                                                                                                                                                                                                                                                                                                                      | Yes              |
| Zhu 2020 <sup>5</sup>     | gP-CD31  | Mouse  | Hindlimb ischemia             | Increases were observed for the vascular endothelial cell marker CD31 in the adductor muscle and the gastrocnemius muscle                                                                                                                                                                                                                                                                                                                                                                                                                                                                              | Yes              |
| Shen 2022 <sup>6</sup>    | mM-CD31  | Mouse  | Multiple cerebral infarctions | CD31 labeling expressed more strongly in the regions of microinfarct than that of control.                                                                                                                                                                                                                                                                                                                                                                                                                                                                                                             | No               |
| Wang 2020 <sup>7</sup>    | mM-CD31  | Rat    | Normal rats                   | CD31-labeled vessels were located on the distal part of blood vessels similar to capillaries in morphology, while CD31-labeled vessels showed only the vessel outline, not the whole lumen.                                                                                                                                                                                                                                                                                                                                                                                                            | No               |
| Xu 2019 <sup>8</sup>      | mM-CD31  | Rat    | Stress                        | Compared with the control rats, the results indicated decreased ratio of GLUT-1 fluorescence intensity/CD31 fluorescence intensity in the restraint-stressed rats at 7, 14 and 21 days.                                                                                                                                                                                                                                                                                                                                                                                                                | No               |
| Gandin 2016 <sup>9</sup>  | mM-CD31  | Mouse  | Ischemia/reperfusion          | Treatment with MLC901 significantly increased the CD31-positive capillary density, vascular perimeters and BrdU-reactive endothelial cell numbers in the ischemic border, as compared with the vehicle-treated mice. Double immunostaining BrdU/CD31 showed that BrdU-positive endothelial cells localized in the vessel, indicating that MLC901 enhanced endothelial cell proliferation and angiogenesis by increasing the number of neocortical vessels invading the ipsilateral infarcted area.                                                                                                     | No               |
| Eckert 2015 <sup>10</sup> | mM-CD31  | Mouse  | Ischemia/reperfusion          | Only showed CD31-labeled blood vessels but without a detailed description and statistical analysis.                                                                                                                                                                                                                                                                                                                                                                                                                                                                                                    | No               |

## References

- 1 Shen, Y. *et al.* Temporal alteration of microglia to microinfarcts in rat brain induced by the vascular occlusion with fluorescent microspheres. *Frontiers in cellular neuroscience* **16**, 956342, doi:10.3389/fncel.2022.956342 (2022).
- 2 Zhang, S. *et al.* Temporal alterations in pericytes at the acute phase of ischemia/reperfusion in the mouse brain. *Neural regeneration research* **17**, 2247-2252, doi:10.4103/1673-5374.336876 (2022).
- 3 Wang, X. *et al.* Type 2 immunity induced by bladder extracellular matrix enhances corneal wound healing. *Science advances* **7**, doi:10.1126/sciadv.abe2635 (2021).
- 4 Chen, M. B. *et al.* Brain Endothelial Cells Are Exquisite Sensors of Age-Related Circulatory Cues. *Cell reports* **30**, 4418-4432.e4414, doi:10.1016/j.celrep.2020.03.012 (2020).
- 5 Zhu, D. *et al.* Macrophage M2 polarization induced by exosomes from adipose-derived stem cells contributes to the exosomal proangiogenic effect on mouse ischemic hindlimb. *Stem cell research & therapy* **11**, 162, doi:10.1186/s13287-020-01669-9 (2020).
- 6 Shen, Y. *et al.* Histochemistry of microinfarcts in the mouse brain after injection of fluorescent microspheres into the common carotid artery. *Neural regeneration research* **17**, 832-837, doi:10.4103/1673-5374.322470 (2022).
- 7 Wang, J. *et al.* A new approach for examining the neurovascular structure with phalloidin and calcitonin gene-related peptide in the rat cranial dura mater. *Journal of molecular histology* **51**, 541-548, doi:10.1007/s10735-020-09903-7 (2020).
- 8 Xu, G. *et al.* Restraint Stress Induced Hyperpermeability and Damage of the Blood-Brain Barrier in the Amygdala of Adult Rats. *Frontiers in molecular neuroscience* **12**, 32, doi:10.3389/fnmol.2019.00032 (2019).
- 9 Gandin, C., Widmann, C., Lazdunski, M. & Heurteaux, C. MLC901 Favors Angiogenesis and Associated Recovery after Ischemic Stroke in Mice. *Cerebrovascular diseases (Basel, Switzerland)* **42**, 139-154, doi:10.1159/000444810 (2016).
- 10 Eckert, A. *et al.* Bystander Effect Fuels Human Induced Pluripotent Stem Cell-Derived Neural Stem Cells to Quickly Attenuate Early Stage Neurological Deficits After Stroke. *Stem cells translational medicine* **4**, 841-851, doi:10.5966/sctm.2014-0184 (2015).
- 11 Kleinschnitz, C. *et al.* Glucocorticoid insensitivity at the hypoxic blood-brain barrier can be reversed by inhibition of the proteasome. *Stroke* **42**, 1081-1089, doi:10.1161/strokeaha.110.592238 (2011).
